# Supplementary material
Source: Springer Nature journal article supplement (https://www.springermedizin.de/resource/supplementary/12967_2009_454_MOESM3_ESM.pdf/9576584)
Supplement: MOESM3 [file 9576584]

Mean Log [Relative Liver HBV DNA (PCR)]

Gender  
□ female  
▨ male

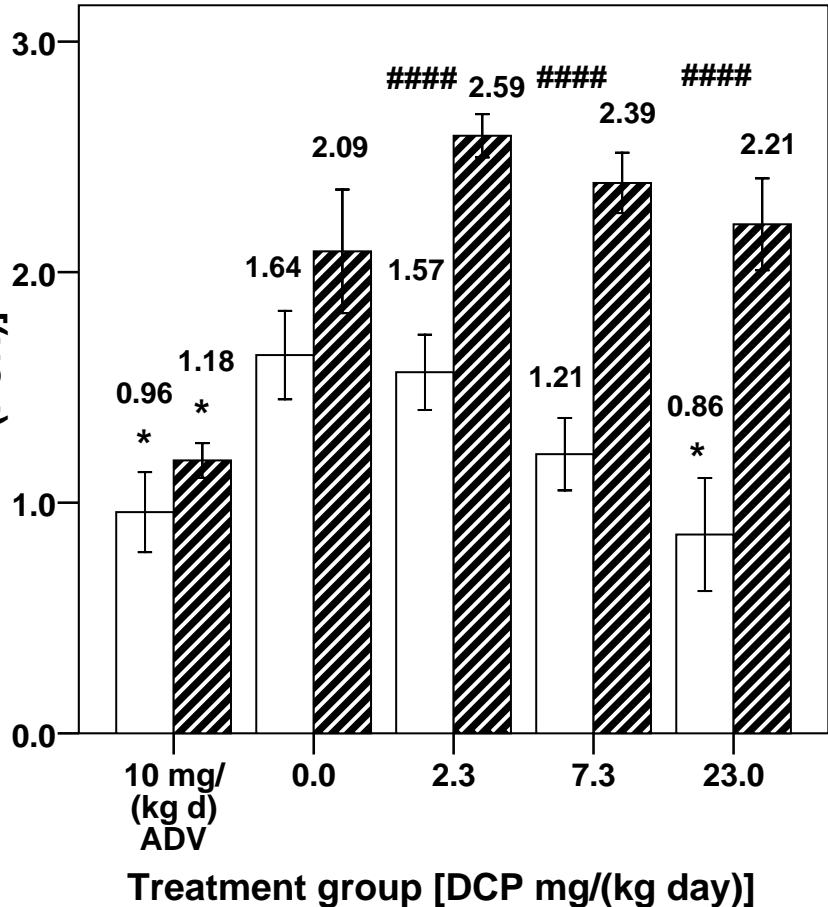

Treatment group [DCP mg/(kg day)]

Error Bars: +/- 1 SE
